# Supplementary material for: Epidemiology and genomic analysis of Shiga toxin-producing Escherichia coli clonal complex 165 in the UK
Source: PubMed Central journal article supplement — J Med Microbiol. 2021 Dec 17;70(12):001471. doi: 10.1099/jmm.0.001471 (PMC8744276; doi:10.1099/jmm.0.001471), 2021-12-17

Supp\_T1

**Supplementary Table 1: Isolates included in the scope of this study, with initial microbiological data including serotype, ST, eae presence and stx subtype. SRA accessions are provided and deposited under the short read archive, Bioproject no. PRJNA315192**

| SRA Accession | Country  | Clonal Complex | ST  | Serotype            | EAE | STX Subtype |
|---------------|----------|----------------|-----|---------------------|-----|-------------|
| SRR12062817   | England  | CC165          | 301 | O80:H2              | +   | stx2d       |
| SRR3240964    | England  | CC165          | 301 | O80:H2              | +   | stx2d       |
| SRR5023804    | England  | CC165          | 301 | O80:H2              | +   | stx2d       |
| SRR3241980    | England  | CC165          | 301 | O132:H2             | +   | stx1a       |
| SRR3578955    | England  | CC165          | 301 | O80:H2              | +   | stx2d       |
| SRR3530809    | England  | CC165          | 301 | O55:H9              | +   | stx2d       |
| SRR3579389    | England  | CC165          | 301 | O80:H2              | +   | stx2d       |
| SRR3574263    | England  | CC165          | 301 | O55:H9              | +   | stx2d       |
| SRR3574219    | England  | CC165          | 301 | O80:H2              | +   | stx2d       |
| SRR4897813    | England  | CC165          | 301 | O80:H2              | +   | stx2d       |
| SRR16230866   | Scotland | CC165          | 189 | O157:H26            | +   | -           |
| SRR7223149    | England  | CC165          | 301 | O80:H2              | +   | stx2d       |
| SRR7265937    | England  | CC165          | 301 | O80:H2              | +   | stx2a       |
| SRR7172268    | England  | CC165          | 189 | O157:H26            | +   | -           |
| SRR7283728    | England  | CC165          | 301 | O80:H2              | +   | stx2d       |
| SRR7286617    | England  | CC165          | 301 | O80:H2              | +   | stx2d       |
| SRR6185827    | England  | CC165          | 382 | O unidentifiable:H5 | +   | -           |
| SRR7221205    | England  | CC165          | 301 | O55:H9              | +   | stx2a       |
| SRR7839374    | England  | CC165          | 301 | O80:H2              | +   | stx2d       |
| SRR7835535    | England  | CC165          | 189 | O157:H26            | +   | -           |
| SRR7842080    | England  | CC165          | 301 | O80:H2              | +   | stx2d       |
| SRR16230867   | Wales    | CC165          | 301 | O80:H2              | +   | stx2a       |
| SRR7988738    | England  | CC165          | 301 | O80:H2              | +   | stx2d       |
| SRR8087114    | England  | CC165          | 301 | O80:H2              | +   | stx2d       |
| SRR8194839    | England  | CC165          | 301 | O80:H2              | +   | stx2a       |
| SRR8368697    | England  | CC165          | 301 | O80:H2              | +   | stx2d       |
| SRR8513787    | England  | CC165          | 301 | O45:H2              | +   | stx2a       |
| SRR8513680    | England  | CC165          | 301 | O80:H2              | +   | stx2d       |
| SRR11361742   | England  | CC165          | 301 | O80:H2              | +   | stx2d       |

Supp\_T1

|             |          |       |     |         |   |       |
|-------------|----------|-------|-----|---------|---|-------|
| SRR9661203  | England  | CC165 | 301 | O80:H2  | + | stx2d |
| SRR9947523  | England  | CC165 | 301 | O45:H2  | + | stx2a |
| SRR16230868 | Wales    | CC165 | 301 | O45:H2  | + | stx2a |
| SRR10386573 | England  | CC165 | 301 | O80:H2  | + | stx2a |
| SRR10748684 | England  | CC165 | 301 | O45:H2  | + | stx2a |
| SRR10858674 | England  | CC165 | 301 | O45:H2  | + | stx2a |
| SRR11361853 | England  | CC165 | 301 | O80:H2  | + | stx2a |
| SRR16230869 | Wales    | CC165 | 301 | O80:H2  | + | stx2d |
| SRR12362236 | England  | CC165 | 301 | O45:H2  | + | stx2a |
| SRR12486101 | England  | CC165 | 301 | O45:H2  | + | stx2a |
| SRR12503027 | England  | CC165 | 301 | O55:H9  | + | stx2d |
| SRR12628584 | England  | CC165 | 165 | O80:H19 | - | -     |
| SRR12635475 | England  | CC165 | 301 | O80:H2  | + | stx2d |
| SRR16230870 | Wales    | CC165 | 301 | O45:H2  | + | stx2a |
| SRR16203501 | Scotland | CC165 | 301 | O80:H2  | + | stx2a |
| SRR16203500 | Scotland | CC165 | 301 | O180:H2 | + | stx2a |
| SRR16203499 | Scotland | CC165 | 301 | O80:H2  | + | stx2d |
| SRR16203498 | Scotland | CC165 | 301 | O80:H2  | + | stx2d |
| SRR16203497 | Scotland | CC165 | 301 | O45:H2  | + | stx2a |

## Supplementary Figures

Supplementary Figure 1: Geographical distribution of STEC cases in England (n=34). Blue dot indicates a CC165 STEC case in England where the patient postcode was available from the Extended Questionnaire. Where postcode was not available the lab postcode was used.

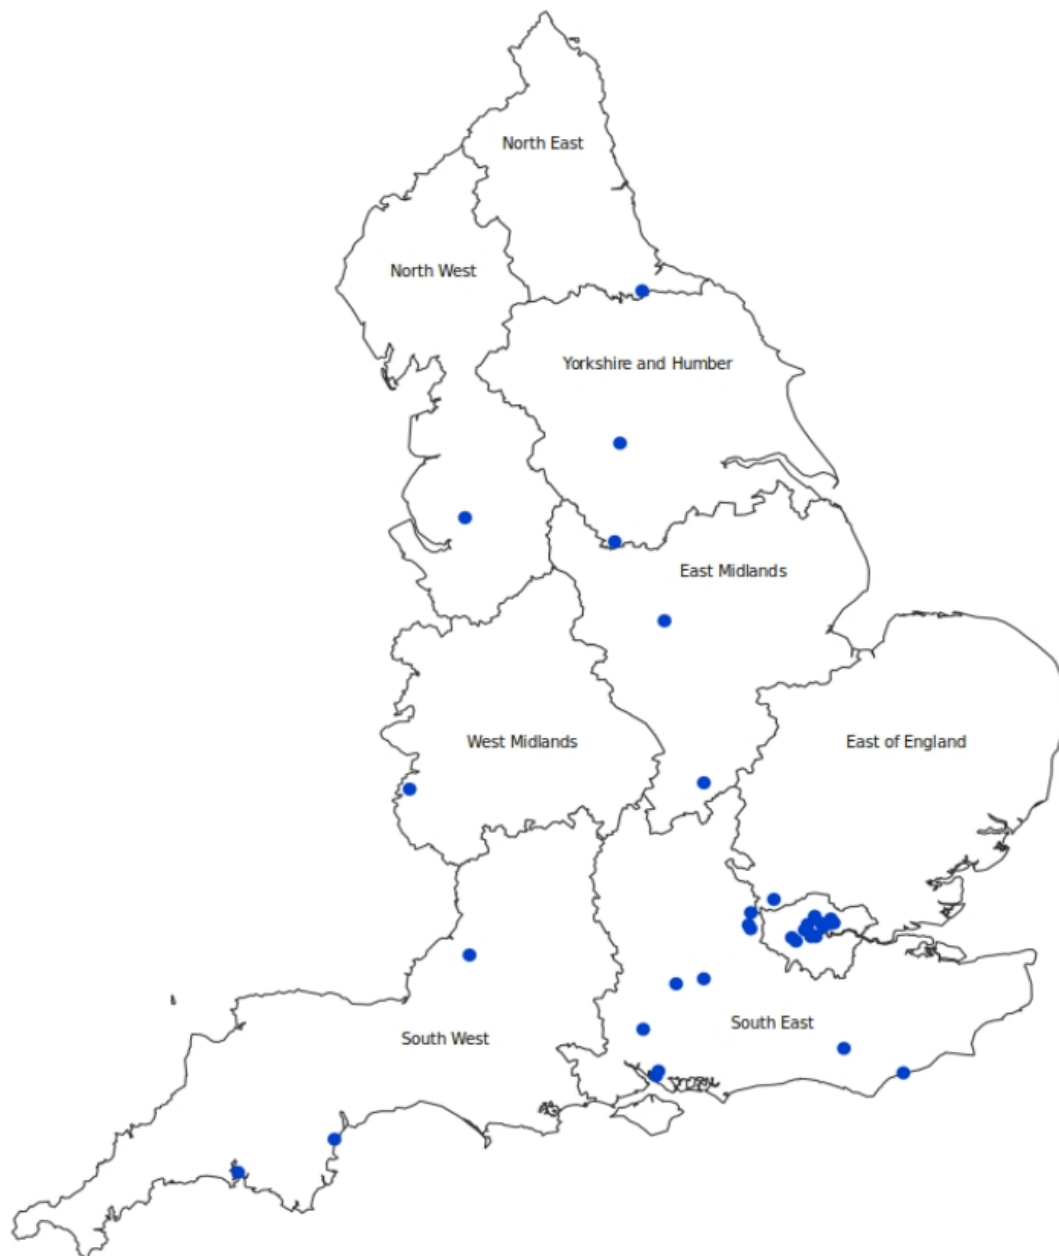

Supplementary Figure 2: Minimum Spanning, 7 Gene MLST Tree of Public Health England *Escherichia coli* isolates submitted to Enterobase between January 2014 and January 2021 (n=10469). Key ST's are labelled, with CC165 circled for ease of identification.

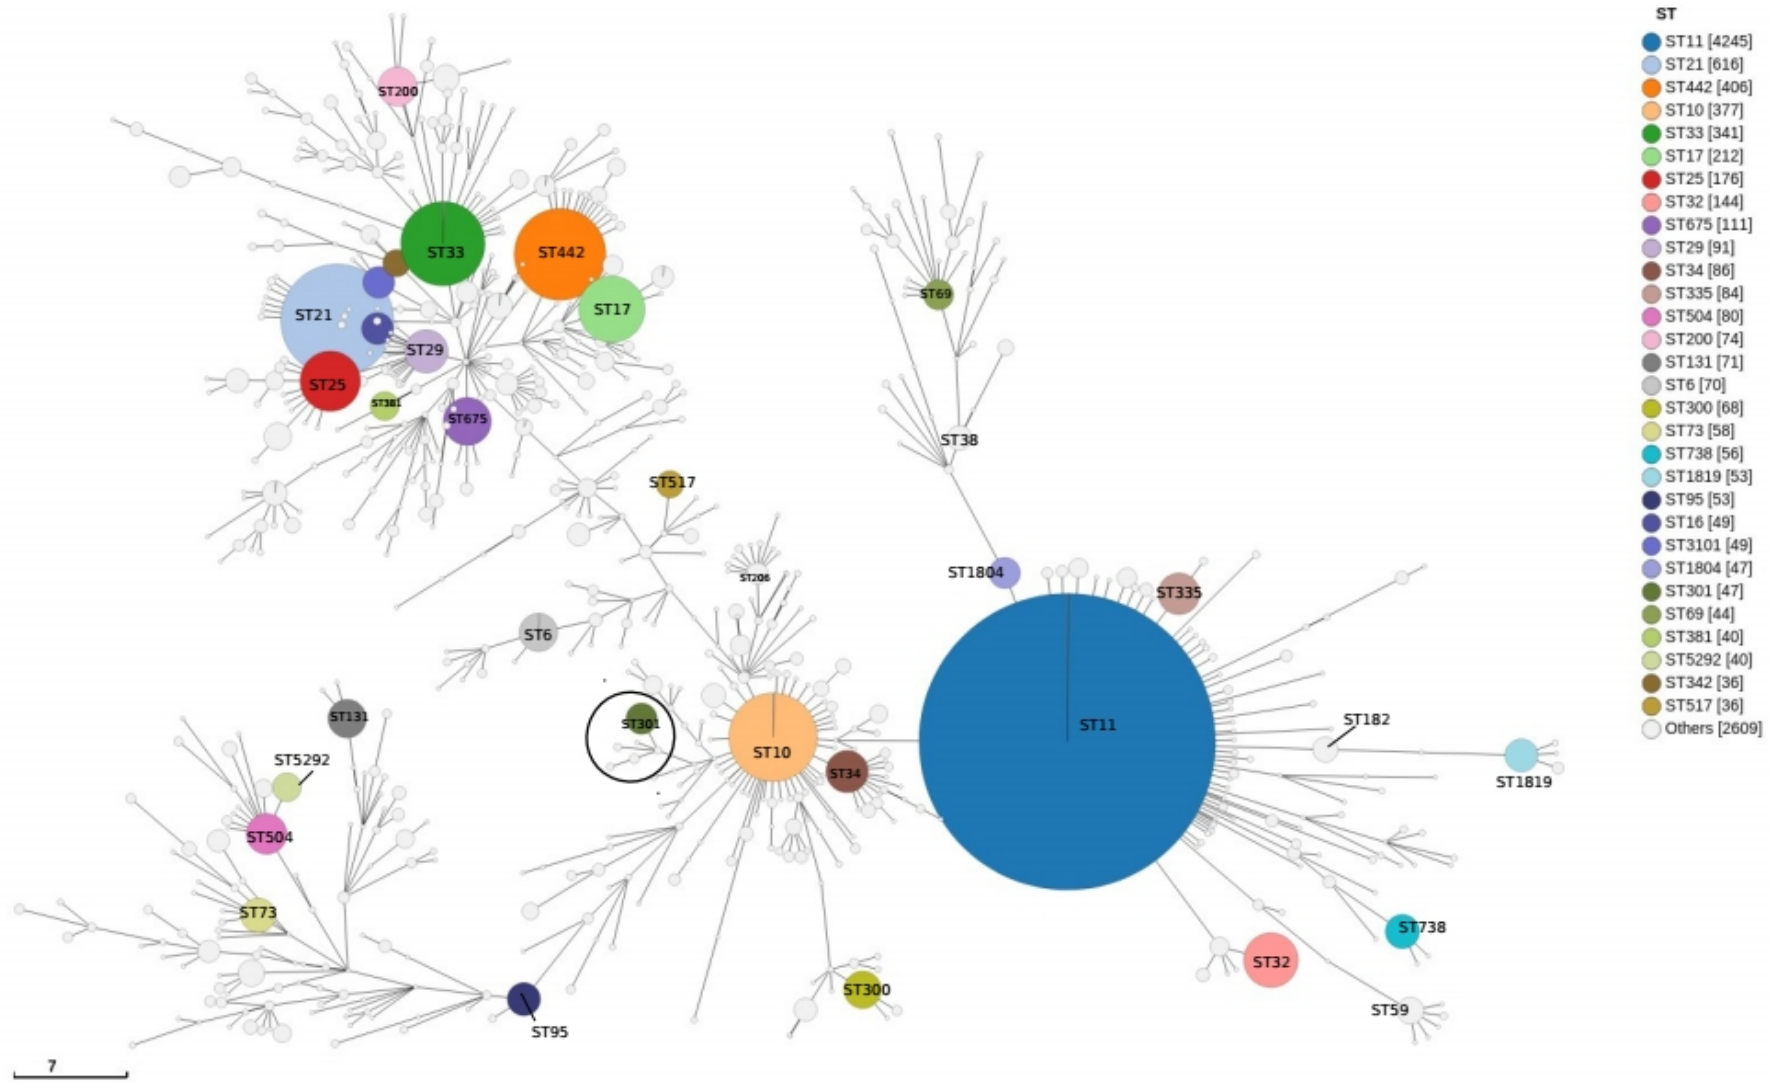

Supplement: jmm-70-1471-s001.pdf [file jmm-70-1471-s001.pdf]
